# Supplementary material
Source: publisher figshare collection journal article supplement (https://gsapubs.figshare.com/ndownloader/files/23302997)
Supplement: Supplementary file 1 [file 23302997]

## Sheet: LIM-ME
	LIM-ME
							Ages
	Sample	207Pb/235U	2 SE	206Pb/238U	2 SE	207Pb/235U	2 SE	206Pb/238U	2 SE
	20Jand06	0.0302	0.0075	0.00385	0.00025	30.5	7.6	24.8	1.6
	20Jand07	0.0198	0.0033	0.00286	0.00014	19.7	3.2	18.39	0.89
	20Jand08	0.0186	0.0037	0.00291	0.00016	18.5	3.7	18.7	1
	20Jand09	0.0168	0.004	0.00305	0.00016	16.6	3.9	19.6	1
	20Jand10	0.531	0.054	0.0074	0.00059	418	36	47.5	3.8
	20Jand11	0.031	0.012	0.0033	0.00035	29	11	21.2	2.2
	20Jand12	0.0222	0.003	0.00306	0.00011	22.1	3	19.68	0.68
	20Jand13	0.051	0.014	0.00348	0.00035	48	13	22.4	2.2
	20Jand14	0.0189	0.0027	0.00314	0.00011	18.9	2.7	20.18	0.73
	20Jand15	0.0206	0.0039	0.00307	0.00016	20.4	3.9	19.7	1
	20Jand16	0.0239	0.0055	0.003	0.00022	23.6	5.4	19.3	1.4
	20Jand18	0.0709	0.0093	0.01042	0.00036	69.2	8.9	66.8	2.3
	20Jand19	0.0269	0.0085	0.00323	0.00026	25.7	8.1	20.8	1.7
	20Jand20	0.073	0.0085	0.00326	0.00016	70.6	8	21.1	1.1
	20Jand21	0.026	0.0051	0.00365	0.00022	25.6	5	23.5	1.4
	22jana08	0.035	0.02	0.00598	0.00077	31	19	38.4	4.9
	22jana09	0.0206	0.0023	0.00312	0.0001	20.5	2.3	20.11	0.66
	22jana10	0.043	0.014	0.00693	0.00047	40	13	44.5	3
	22jana11	0.0182	0.0085	0.00308	0.00027	17.3	8.3	19.8	1.7
	22jana12	0.017	0.0056	0.0033	0.00023	16.5	5.5	21.2	1.5
	22jana13	0.022	0.01	0.00341	0.00035	20.4	9.5	22	2.2
	22jana14	0.105	0.019	0.01447	0.00062	97	17	92.5	4
	22jana15	0.0218	0.0015	0.003149	7e-05	21.8	1.5	20.27	0.45
	22jana16	0.0197	0.0025	0.0031	0.00011	19.7	2.5	19.93	0.74
	22jana17	0.0213	0.0029	0.00332	0.00014	21.3	2.9	21.38	0.93
	22jana18	0.0286	0.0073	0.00359	0.00025	28.4	7.2	23.1	1.6
	22jana19	0.026	0.0087	0.00356	0.0003	25.8	8.6	22.9	2
	20Janb06	0.0254	0.0044	0.00317	0.00015	25.1	4.3	20.38	0.98
	20Janb07	0.0476	0.0051	0.00376	0.00011	46.8	4.8	24.22	0.69
	20Janb08	0.0233	0.0039	0.00339	0.00014	23.2	3.8	21.82	0.88
	20Janb09	0.0419	0.0034	0.00674	0.00014	42	3.4	43.3	0.91
	20Janb10	0.0379	0.006	0.00351	0.0002	37.2	5.9	22.6	1.3
	20Janb11	0.0252	0.0051	0.00324	0.00018	24.9	5	20.9	1.1
	20Janb12	0.0335	0.0054	0.00451	0.0002	32.9	5.3	29	1.3
	20Janb13	0.0213	0.0043	0.00331	0.00015	21.1	4.3	21.32	0.96
	20Janb14	0.0242	0.0046	0.00333	0.00017	23.9	4.5	21.4	1.1
	20Janb15	0.0185	0.0052	0.00318	0.00019	18.1	5.1	20.5	1.2
	20Janb16	0.0582	0.0062	0.00394	0.00011	57	5.9	25.32	0.72
	20Janb17	0.0242	0.0076	0.00331	0.00024	24.3	7.6	21.3	1.5
	20Janb18	0.087	0.02	0.00368	0.00039	82	18	23.7	2.5
	20Janb19	0.0273	0.0078	0.00302	0.00027	26.9	7.7	19.5	1.7
	20Janb20	0.0269	0.0096	0.00308	0.00029	25.3	9.2	19.8	1.9
	20Janb21	0.0261	0.0059	0.0032	0.00017	25.6	5.8	20.6	1.1
	20Janc07	0.0222	0.0036	0.00298	0.00013	22.1	3.5	19.21	0.83
	20Janc08	0.0228	0.0024	0.003116	9.2e-05	22.8	2.4	20.05	0.59
	20Janc09	0.0211	0.0055	0.00304	0.00018	20.6	5.4	19.6	1.2
	20Janc10	0.0209	0.0045	0.00329	0.00017	20.6	4.5	21.1	1.1
	20Janc11	0.0207	0.0031	0.00304	0.00013	20.7	3.1	19.54	0.85
	20Janc12	0.0189	0.0045	0.0032	0.00017	19.1	4.5	20.6	1.1
	20Janc13	0.198	0.018	0.00497	0.00031	181	15	32	2
	20Janc14	0.128	0.028	0.00764	0.00054	115	24	49	3.5
	20Janc15	0.146	0.03	0.00417	0.00038	133	25	26.8	2.4
	20Janc16	0.0126	0.0031	0.001381	9.2e-05	12.6	3.1	8.9	0.59
	20Janc17	0.0222	0.0028	0.00312	0.00011	22.1	2.8	20.06	0.7
	20Janc18	0.0198	0.0045	0.00322	0.00016	19.6	4.4	20.7	1
	20Janc19	0.0211	0.0042	0.00315	0.00016	20.9	4.1	20.3	1
	20Janc20	0.0217	0.0022	0.003175	9.2e-05	21.7	2.2	20.44	0.59
	20Janc21	0.0179	0.0039	0.00308	0.00015	17.8	3.9	19.82	0.94

## Sheet: LIM-ME2
	LIM-ME2
							Ages
	Sample	207Pb/235U	2 SE	206Pb/238U	2 SE	207Pb/235U	2 SE	206Pb/238U	2 SE
	02Decc05	0.011	0.012	0.00287	0.0003	9	11	18.5	1.9
	02Decc06	0.072	0.012	0.01061	0.00051	68	12	68	3.2
	02Decc07	0.061	0.01	0.0103	0.00043	58.2	9.6	66	2.8
	02Decc08	0.069	0.011	0.01061	0.00041	65	10	68	2.6
	02Decc09	0.063	0.013	0.00911	0.00046	61	12	58.4	2.9
	02Decc10	0.053	0.014	0.00991	0.00063	52	14	63.6	4
	02Decc11	0.067	0.014	0.01023	0.00052	63	13	65.6	3.3
	02Decc12	0.056	0.012	0.00978	0.00045	53	11	62.7	2.8
	02Decc13	0.058	0.01	0.00977	0.00035	55.4	9.8	62.7	2.3
	02Decc15	0.0158	0.0066	0.00306	0.00021	15.3	6.5	19.7	1.4
	02Decc16	0.052	0.012	0.00948	0.00049	50	12	60.8	3.2
	02Decd01	0.053	0.038	0.0099	0.0012	41	34	63.5	7.6
	02Decd02	0.054	0.015	0.01038	0.00063	52	14	66.5	4
	02Decd03	0.0639	0.0086	0.01071	0.00032	62.2	8.2	68.7	2
	02Decd04	0.062	0.013	0.00987	0.00047	58	12	63.3	3
	02Decd05	0.052	0.017	0.01006	0.00055	47	16	64.5	3.5
	02Decd06	0.061	0.01	0.01055	0.0004	59.2	9.6	67.6	2.5
	02Decd07	0.078	0.017	0.01114	0.00053	71	15	71.4	3.4
	02Decd08	0.0654	0.0053	0.01083	0.00023	64.8	4.9	69.4	1.5
	02Decd09	0.063	0.012	0.01076	0.00055	61	12	69	3.5
	02Decd10	0.078	0.028	0.0155	0.0012	66	25	99	7.4
	02Decd11	0.0662	0.0077	0.01037	0.00032	64.7	7.4	66.5	2.1
	02Decd12	0.0186	0.0038	0.00335	0.00015	18.5	3.8	21.68	0.94
	02Decd13	0.0625	0.0073	0.01016	0.00029	61.2	7	65.1	1.9
	03Decg01	0.0682	0.0065	0.00985	0.00031	66.7	6.2	63.2	2
	03Decg02	0.0684	0.0094	0.01027	0.00034	67.1	9	65.9	2.2
	03Decg03	0.07	0.01	0.00994	0.00039	66.9	9.5	63.7	2.5
	03Decg04	0.071	0.011	0.00997	0.00046	70	11	63.9	3
	03Decg05	0.0554	0.0078	0.00975	0.00038	53.5	7.4	62.5	2.4
	03Decg06	0.077	0.017	0.00942	0.00054	75	16	60.4	3.5
	03Decg07	0.0694	0.0092	0.01032	0.00034	66.5	8.7	66.2	2.2
	03Decg08	0.064	0.01	0.00966	0.00035	60.6	9.8	61.9	2.2
	03Decg09	0.081	0.02	0.0105	0.00074	73	18	67.2	4.7
	03Decg11	0.0595	0.0084	0.00995	0.00033	57.4	8	63.8	2.1
	03Decg12	0.0236	0.0079	0.00321	0.00029	22.4	7.6	20.6	1.8
	03Decg13	0.058	0.01	0.00955	0.00042	57	10	61.5	2.7
	03Dech01	0.078	0.015	0.01043	0.00058	72	13	66.9	3.7
	03Dech02	0.0612	0.0096	0.00877	0.00042	59.5	9.2	56.2	2.7
	03Dech03	0.0718	0.0093	0.00946	0.00038	70.3	8.9	60.7	2.4
	03Dech04	0.052	0.019	0.00973	0.00067	44	18	62.4	4.3
	03Dech05	0.0702	0.0084	0.0101	0.00032	68.2	8	64.7	2.1
	03Dech06	0.0665	0.0098	0.00977	0.00036	63.5	9.1	62.6	2.3
	03Dech07	0.074	0.01	0.00996	0.0004	70.4	9.5	63.9	2.6
	03Dech08	0.075	0.031	0.00903	0.00093	67	29	57.9	5.9
	03Dech09	0.052	0.012	0.00854	0.00045	49	11	54.8	2.9
	03Dech10	0.078	0.017	0.00937	0.00062	68	14	60.1	4
	03Dech11	0.084	0.038	0.0084	0.0011	70	32	54.1	7.3
	03Dech12	0.068	0.017	0.00848	0.0006	62	15	54.4	3.8
	03Dech13	0.075	0.013	0.01012	0.00045	72	12	64.9	2.9
	18Janb05	0.054	0.02	0.00988	0.00063	46	18	63.6	4
	18Janb06	0.0726	0.0094	0.01033	0.00036	69.8	8.8	66.5	2.3
	18Janb07	0.0214	0.0061	0.00321	0.00019	20.9	6	20.7	1.2
	18Janb08	0.042	0.024	0.00877	0.00092	37	23	56.3	5.9
	18Janb09	0.079	0.019	0.01024	0.00059	72	18	66	3.7
	18Janb10	0.075	0.013	0.00974	0.00048	70	12	62.5	3.1
	18Janb11	0.071	0.01	0.01048	0.00032	68.3	9.7	67.2	2.1
	18Janb12	0.058	0.018	0.01012	0.00064	53	16	65.3	4.1
	18Janb13	0.067	0.022	0.00932	0.00074	62	20	59.8	4.7
	18Janb14	0.0745	0.0077	0.01117	0.00032	73.3	7.3	71.6	2
	18Janb15	0.068	0.018	0.00986	0.00072	61	17	63.2	4.6
	18Janb16	0.0618	0.0091	0.00962	0.00039	60.7	8.8	61.7	2.5
	18Janb17	0.0641	0.0076	0.01094	0.00038	62.9	7.3	70.1	2.4
	18Janb18	0.055	0.015	0.01003	0.00057	56	15	64.6	3.6

## Sheet: LIM-PE1
	LIM-PE1
							Ages
	Sample	207Pb/235U	2 SE	206Pb/238U	2 SE	207Pb/235U	2 SE	206Pb/238U	2 SE
	02Deca05	0.0163	0.0037	0.00285	0.00013	16.1	3.7	18.31	0.81
	02Deca06	0.058	0.022	0.00858	0.00065	53	20	55.6	4.3
	02Deca07	0.089	0.024	0.01202	0.00091	79	22	76.9	5.8
	02Deca08	0.066	0.021	0.01006	0.00084	62	19	64.4	5.4
	02Deca09	0.02	0.016	0.00298	0.00041	22	17	19.2	2.7
	02Deca10	0.054	0.02	0.00982	0.00076	47	19	62.9	4.9
	02Deca11	0.0188	0.0074	0.00274	0.00022	18	7.2	17.6	1.4
	02Deca12	0.0228	0.0089	0.00256	0.00023	21.9	8.7	16.5	1.5
	02Deca13	0.053	0.014	0.00836	0.00057	49	13	53.6	3.6
	02Deca14	0.0542	0.0089	0.00858	0.00042	52.4	8.5	55	2.7
	02Deca15	0.055	0.016	0.01043	0.00069	51	15	66.8	4.4
	02Deca16	0.0585	0.0084	0.00878	0.00055	57	8.1	56.3	3.5
	02Decb05	0.0281	0.0085	0.00486	0.00036	27.2	8.2	31.2	2.3
	02Decb06	0.0148	0.0037	0.00235	0.00016	14.6	3.6	15.1	1
	02Decb07	0.073	0.019	0.01292	0.00078	68	18	82.6	5
	02Decb09	0.0331	0.0062	0.00543	0.00023	32.3	6	34.9	1.4
	02Decb10	0.021	0.0095	0.0031	0.00027	19.3	9.2	19.9	1.7
	02Decb11	0.013	0.02	0.00169	0.0004	10	19	10.9	2.5
	02Decb12	0.08	0.02	0.01249	0.00067	71	18	80.7	4.1
	02Decb14	0.04	0.01	0.00608	0.00041	38.8	9.7	39.1	2.6
	02Decb15	0.0454	0.0064	0.00634	0.00022	44.8	6.2	40.7	1.4
	02Decb16	0.089	0.016	0.01308	0.00055	82	15	83.8	3.5
	25Jana05	0.0185	0.0072	0.00317	0.00027	18	7.1	20.4	1.7
	25Jana06	0.067	0.023	0.01129	0.00092	58	21	72.9	5.9
	25Jana07	0.0264	0.0065	0.00413	0.00027	26.6	6.5	26.6	1.7
	25Jana08	0.096	0.019	0.01297	0.00068	92	18	83	4.3
	25Jana09	0.072	0.013	0.00922	0.0005	69	12	59.2	3.2
	25Jana10	0.018	0.012	0.00362	0.00044	16	12	23.3	2.8
	25Jana11	0.05	0.016	0.00845	0.00061	47	15	54.2	3.9
	25Jana12	0.0142	0.0054	0.00303	0.00023	14	5.4	19.5	1.5
	25Jana13	0.0154	0.0029	0.00247	0.00013	15.4	2.9	15.92	0.83
	25Jana15	0.0206	0.0077	0.00403	0.00036	19.8	7.5	25.9	2.3
	25Jana16	0.0159	0.0032	0.00265	0.00013	15.8	3.2	17.07	0.82
	25Jana17	0.0236	0.0073	0.00301	0.00022	21.9	6.9	19.4	1.4
	25Jana18	0.0128	0.0048	0.00136	0.00014	12.5	4.8	8.79	0.92
	25Janb01	0.0384	0.0091	0.00631	0.00041	36.8	8.7	40.5	2.6
	25Janb02	0.072	0.012	0.01328	0.00061	68	11	85	3.9
	25Janb03	0.0241	0.0079	0.00352	0.00034	23.2	7.6	22.7	2.2
	25Janb04	0.017	0.0041	0.003	0.00018	16.8	4	19.3	1.1
	25Janb05	0.037	0.018	0.00531	0.00066	37	17	34.1	4.2
	25Janb06	0.061	0.015	0.00901	0.00057	57	14	57.8	3.6
	25Janb07	0.0317	0.0078	0.00487	0.00034	30.8	7.6	31.3	2.2
	25Janb08	0.0138	0.003	0.00256	0.00013	13.7	3	16.5	0.85
	25Janb09	0.048	0.028	0.0033	0.00067	40	25	21.2	4.3
	25Janb10	0.034	0.012	0.00402	0.00047	32	12	25.9	3
	25Janb11	0.0201	0.0032	0.00333	0.00016	20.1	3.2	21.4	1
	25Janb12	0.0419	0.0033	0.00697	0.00015	41.4	3.2	44.75	0.99

## Sheet: PRC-ME16
	PRC-ME16
							Ages
	Sample	207Pb/235U	2 SE	206Pb/238U	2 SE	207Pb/235U	2 SE	206Pb/238U	2 SE
	02Dece01	0.0695	0.008	0.01001	0.00029	66.9	7.6	64.2	1.9
	02Dece02	0.058	0.013	0.00996	0.00052	55	12	63.8	3.3
	02Dece03	0.067	0.014	0.00971	0.00053	62	13	62.3	3.4
	02Dece04	0.074	0.014	0.01038	0.00052	69	13	66.5	3.3
	02Dece05	0.065	0.012	0.01082	0.00045	61	11	69.4	2.8
	02Dece06	0.075	0.013	0.01258	0.00057	72	12	80.5	3.6
	02Dece07	0.093	0.02	0.01317	0.00078	85	18	84.3	4.9
	02Dece08	0.085	0.013	0.01275	0.00051	80	12	81.6	3.3
	02Dece09	0.094	0.027	0.01411	0.00095	84	25	90.3	6
	02Dece10	0.0665	0.0096	0.01052	0.0004	63.6	9	67.5	2.6
	02Dece11	0.056	0.013	0.00954	0.00051	51	12	61.2	3.3
	02Dece12	0.072	0.021	0.01302	0.00082	63	19	83.8	5.2
	02Decf01	0.0692	0.0077	0.01007	0.00026	67.5	7.4	64.6	1.7
	02Decf02	0.092	0.018	0.01234	0.0006	85	16	79	3.9
	02Decf03	0.06	0.011	0.01003	0.00042	57	10	64.3	2.7
	02Decf04	0.0571	0.0072	0.00978	0.00031	55.3	6.9	62.7	2
	02Decf05	0.06	0.019	0.00957	0.00075	56	18	61.3	4.8
	02Decf06	0.062	0.011	0.01036	0.00043	60	10	66.4	2.7
	02Decf07	0.075	0.011	0.01157	0.00048	71	10	74.1	3.1
	02Decf08	0.052	0.014	0.00996	0.00055	50	13	63.8	3.5
	02Decf09	0.0668	0.0093	0.0106	0.00034	64.9	8.8	68	2.1
	02Decf11	0.072	0.024	0.01274	0.00095	66	23	81.5	6.1
	02Decf112	0.089	0.014	0.01378	0.00055	83	13	88.2	3.5
	02Decf13	0.09	0.016	0.01552	0.00071	84	15	99.2	4.5
	04Decc05	0.066	0.014	0.00949	0.00049	63	13	60.9	3.1
	04Decc06	0.074	0.011	0.01015	0.00044	71	10	65.1	2.8
	04Decc07	0.028	0.011	0.00329	0.00031	26	11	21.3	2
	04Decc08	0.0682	0.0069	0.01015	0.00028	66.2	6.6	65.1	1.8
	04Decc09	0.07	0.012	0.01038	0.00042	66	11	66.6	2.7
	04Decc12	0.071	0.012	0.00939	0.00043	68	11	60.2	2.7
	04Decc13	0.053	0.017	0.00494	0.00046	49	16	31.7	3
	04Decc14	0.108	0.026	0.01467	0.00085	96	23	93.8	5.4
	04Decc15	0.073	0.013	0.01017	0.0004	70	12	65.2	2.5
	04Decc16	0.088	0.019	0.00956	0.0005	80	17	61.3	3.2
	04Decc17	0.051	0.016	0.00566	0.00048	46	15	36.4	3.1
	19Jand01	0.071	0.012	0.0108	0.0005	69	11	69.2	3.2
	19Jand02	0.0639	0.0099	0.00988	0.00041	61.2	9.3	63.6	2.7
	19Jand03	0.065	0.013	0.01042	0.00054	62	12	66.8	3.4
	19Jand04	0.077	0.013	0.01006	0.0005	73	12	64.5	3.2
	19Jand05	0.058	0.012	0.01036	0.00049	56	11	66.4	3.2
	19Jand06	0.068	0.015	0.01028	0.00058	64	14	65.9	3.7
	19Jand07	0.0125	0.0055	0.00193	0.00018	12.1	5.4	12.5	1.2
	19Jand08	0.072	0.019	0.01048	0.00078	66	17	67.2	5
	19Jand09	0.06	0.013	0.00934	0.00053	57	12	59.9	3.4
	19Jand10	0.082	0.014	0.01299	0.0006	76	13	83.1	3.8
	19Jand11	0.083	0.02	0.01348	0.00079	75	18	86.2	5
	19Jand12	0.0677	0.0098	0.01045	0.00034	64.8	9.2	67	2.2
	19Jand13	0.095	0.015	0.01271	0.00063	90	14	81.4	4

## Sheet: PI-DP
	PI-DP
							Ages
	Sample	207Pb/235U	2 SE	206Pb/238U	2 SE	207Pb/235U	2 SE	206Pb/238U	2 SE
	19Jane06	0.098	0.018	0.0151	0.0007	89	17	97	4.5
	19Jane07	0.105	0.021	0.01363	0.0007	93	19	87.2	4.4
	19Jane08	0.055	0.016	0.00956	0.0007	49	15	61.3	4.5
	19Jane09	0.092	0.014	0.01454	0.00055	87	12	93	3.5
	19Jane10	0.085	0.027	0.0142	0.0012	72	24	90.8	7.6
	19Jane11	0.068	0.017	0.00851	0.00062	64	16	54.6	3.9
	19Jane12	0.0725	0.0098	0.01058	0.00043	69.4	9.2	67.8	2.7
	19Jane13	0.061	0.01	0.0102	0.00043	58.4	9.6	65.7	2.8
	19Jane14	0.017	0.025	0.00299	0.00074	9	22	19.2	4.7
	19Jane15	0.1016	0.0099	0.0153	0.0004	97.4	9.2	97.8	2.5
	19Jane16	0.0258	0.0086	0.00401	0.00031	24.8	8.3	25.8	2
	19Jane17	0.0367	0.0084	0.00437	0.00033	35.4	8.1	28.1	2.1
	19Janf01	0.026	0.01	0.00366	0.00032	25.4	9.9	23.5	2
	19Janf02	0.016	0.035	0.0044	0.0011	4	29	28.3	6.8
	19Janf03	0.102	0.017	0.01289	0.00075	96	16	83	4.8
	19Janf04	0.107	0.02	0.01401	0.00077	104	19	89.6	4.9
	19Janf05	0.065	0.019	0.00892	0.00082	61	18	57.2	5.2
	19Janf06	0.069	0.016	0.01017	0.00058	63	14	65.2	3.7
	19Janf07	0.1	0.027	0.0145	0.0012	87	24	92.8	7.6
	19Janf08	0.0276	0.0084	0.0036	0.0003	26.7	8.1	23.2	1.9
	19Janf09	0.0377	0.0091	0.00467	0.00033	36.3	8.7	30	2.1
	19Janf10	0.106	0.01	0.0168	0.00043	102.1	9.6	107.4	2.7
	19Janf11	0.104	0.016	0.01367	0.00058	97	15	87.5	3.7
	19Janf12	0.05	0.014	0.00922	0.00066	46	13	59.1	4.2
	19Janf13	0.078	0.019	0.01028	0.00077	79	19	65.9	4.9
	19Janf14	0.0318	0.0087	0.00438	0.00032	30.4	8.3	28.1	2.1
	19Jang01	0.0213	0.0074	0.00352	0.00035	20.8	7.2	22.7	2.3
	19Jang02	0.03	0.018	0.00306	0.00068	23	15	19.7	4.3
	19Jang03	0.0915	0.0071	0.01322	0.0003	88.3	6.6	84.6	1.9
	19Jang04	0.0297	0.007	0.00404	0.00027	29.1	6.8	26	1.8
	19Jang05	0.093	0.019	0.01364	0.00077	86	17	87.3	4.9
	19Jang06	0.089	0.012	0.01394	0.00051	87	11	89.2	3.3
	19Jang07	0.055	0.01	0.00855	0.00041	53.2	9.8	54.9	2.6
	19Jang08	0.065	0.0072	0.01026	0.00029	63.3	6.8	65.8	1.8
	19Jang09	0.049	0.025	0.00536	0.00098	45	23	34.4	6.3
	19Jang10	0.053	0.012	0.00956	0.0006	51	11	61.3	3.9
	19Jang11	0.152	0.052	0.0192	0.002	117	40	122	13
	19Jang12	0.142	0.033	0.0166	0.0013	126	29	106	8
	19Jang13	0.0143	0.0075	0.00117	0.00022	14	7.4	7.5	1.4
	19Jang14	0.065	0.02	0.00915	0.00075	59	18	58.7	4.8
	20Jana05	0.058	0.012	0.01	0.0005	56	11	64.1	3.2
	20Jana06	0.109	0.028	0.01237	0.00089	97	24	79.2	5.7
	20Jana07	0.084	0.015	0.01473	0.00064	81	14	94.2	4
	20Jana08	0.0635	0.0078	0.00907	0.00033	62	7.4	58.2	2.1
	20Jana09	0.039	0.029	0.00296	0.00066	27	24	19	4.2
	20Jana10	0.095	0.019	0.01441	0.00075	91	17	92.2	4.7
	20Jana11	0.088	0.022	0.01455	0.00097	80	19	93	6.2
	20Jana12	0.096	0.017	0.01268	0.00063	91	16	81.2	4
	20Jana13	0.081	0.021	0.00957	0.0008	73	19	61.3	5.1
	20Jana14	0.094	0.022	0.01167	0.00088	86	20	75.4	5.7

## Sheet: PISCO2
	PISCO2
							Ages
	Sample	207Pb/235U	2 SE	206Pb/238U	2 SE	207Pb/235U	2 SE	206Pb/238U	2 SE
	20Janb05	0.064	0.011	0.00979	0.0005	61	11	62.7	3.2
	20Janb06	0.065	0.02	0.01014	0.00086	59	19	65	5.5
	20Janb07	0.033	0.012	0.0033	0.00036	31	11	21.2	2.3
	20Janb08	0.061	0.019	0.01009	0.00082	58	18	64.7	5.3
	20Janb09	0.0643	0.008	0.01028	0.00037	61.9	7.6	65.9	2.4
	20Janb10	0.067	0.014	0.0103	0.00062	65	13	66	4
	20Janb11	0.067	0.014	0.01054	0.00057	66	13	67.6	3.7
	20Janb12	0.0056	0.0073	0.00327	0.00041	5	6.9	21	2.6
	20Janb13	0.086	0.014	0.01059	0.00047	81	13	67.9	3
	20Janb14	0.082	0.013	0.01021	0.00059	77	12	65.5	3.7
	20Janb15	0.075	0.014	0.0104	0.0005	71	13	66.7	3.2
	20Janb16	0.086	0.02	0.00998	0.00062	79	18	64	4
	20Janb17	0.068	0.01	0.01012	0.00034	65.2	9.7	64.9	2.2
	20Janc01	0.071	0.013	0.00999	0.00056	68	13	64	3.6
	20Janc02	0.061	0.011	0.00934	0.00042	58	10	59.9	2.7
	20Janc03	0.064	0.015	0.01057	0.00069	60	14	67.8	4.4
	20Janc04	0.063	0.019	0.00929	0.00074	59	17	59.5	4.7
	20Janc05	0.059	0.016	0.00977	0.00064	58	16	62.6	4.1
	20Janc06	0.0653	0.0084	0.01005	0.00035	63.3	8	64.4	2.3
	20Janc07	0.059	0.015	0.00944	0.00056	54	14	60.5	3.6
	20Janc08	0.078	0.025	0.00905	0.00077	71	23	58.8	5.1
	20Janc09	0.062	0.012	0.00973	0.0006	58	12	62.4	3.8
	20Janc10	0.0631	0.0098	0.01001	0.00041	60.5	9.2	64.4	2.6
	20Janc11	0.065	0.012	0.01029	0.00056	61	12	66.3	3.6
	20Janc12	0.086	0.021	0.01008	0.00066	79	19	64.6	4.2
	20Janc13	0.0684	0.0066	0.00982	0.00025	67.1	6.3	63	1.6
	20Jand01	0.075	0.013	0.00992	0.00052	71	12	63.6	3.3
	20Jand02	0.063	0.014	0.00982	0.00056	59	13	63	3.5
	20Jand03	0.081	0.02	0.01011	0.00073	74	18	64.8	4.6
	20Jand04	0.057	0.012	0.00972	0.00048	54	11	62.3	3.1
	20Jand05	0.081	0.014	0.00994	0.00052	78	13	63.8	3.3
	20Jand06	0.078	0.017	0.00983	0.00058	73	15	63	3.7
	20Jand07	0.077	0.014	0.01082	0.00053	73	13	69.3	3.4
	20Jand08	0.056	0.012	0.01013	0.00053	53	11	65.2	3.4
	20Jand09	0.076	0.011	0.01025	0.00044	72	10	66	2.8
	20Jand10	0.082	0.018	0.01103	0.00073	79	17	70.7	4.6
	20Jand11	0.088	0.021	0.01055	0.0008	80	18	67.6	5.1
	20Jand12	0.068	0.011	0.01014	0.00039	66	10	65	2.5
	20Jand13	0.075	0.016	0.00997	0.00062	70	14	63.9	4
	20Jand14	0.061	0.013	0.00992	0.00055	57	12	63.6	3.5

## Sheet: PISCO3
	PISCO3
							Ages
	Sample	207Pb/235U	2 SE	206Pb/238U	2 SE	207Pb/235U	2 SE	206Pb/238U	2 SE
	20Jane01	0.046	0.013	0.00858	0.00065	44	12	55	4.2
	20Jane02	0.078	0.022	0.00964	0.00078	75	20	61.8	5
	20Jane03	0.061	0.013	0.00951	0.00062	61	12	61.8	3.9
	20Jane04	0.095	0.032	0.0105	0.0013	81	27	67.1	8.1
	20Jane05	0.063	0.013	0.00972	0.00059	59	12	62.3	3.8
	20Jane06	0.064	0.016	0.00912	0.00077	60	15	58.5	4.9
	20Jane08	0.066	0.014	0.00981	0.00049	63	13	62.9	3.2
	20Jane09	0.062	0.016	0.009	0.00072	56	14	57.7	4.6
	20Jane10	0.063	0.013	0.00965	0.00049	61	12	61.9	3.1
	20Jane11	0.064	0.013	0.00961	0.00048	61	12	61.6	3.1
	20Jane12	0.07	0.015	0.00879	0.00064	65	14	56.7	4
	20Jane13	0.06	0.019	0.00896	0.0007	55	17	57.5	4.5
	20Jane14	0.056	0.012	0.00937	0.00052	55	11	60.1	3.3
	20Janf05	0.064	0.014	0.01102	0.00058	60	13	70.6	3.7
	20Janf06	0.068	0.01	0.00981	0.00041	65.5	9.4	62.9	2.6
	20Janf07	0.072	0.018	0.00956	0.00067	66	17	62.2	4.3
	20Janf08	0.074	0.016	0.00966	0.00052	71	15	62	3.3
	20Janf09	0.074	0.021	0.00943	0.00066	74	20	60.5	4.2
	20Janf10	0.072	0.012	0.00916	0.00047	69	11	58.8	3
	20Janf11	0.073	0.016	0.00992	0.00057	69	15	63.6	3.7
	20Janf12	0.077	0.026	0.00919	0.00085	69	23	58.9	5.4
	20Janf13	0.0666	0.0066	0.0096	0.00029	66.3	6.5	61.6	1.8
	20Janf14	0.07	0.012	0.00973	0.00049	67	11	62.4	3.1
	20Janf15	0.0638	0.0093	0.00977	0.00047	61.3	8.8	62.7	3
	20Janf16	0.062	0.012	0.00934	0.00059	59	11	59.9	3.7
	20Janf17	0.065	0.01	0.00955	0.00043	62.4	9.5	61.2	2.8
	20Jang01	0.059	0.019	0.00928	0.00073	53	17	60	4.6
	20Jang02	0.079	0.016	0.01035	0.00061	75	15	66.3	3.9
	20Jang03	0.06	0.018	0.00934	0.00076	55	16	59.9	4.9
	20Jang04	0.073	0.014	0.00967	0.00052	67	12	62	3.3
	20Jang05	0.071	0.011	0.00946	0.00048	67	11	60.6	3.1
	20Jang06	0.064	0.012	0.01053	0.00053	61	11	67.5	3.4
	20Jang07	0.075	0.012	0.01013	0.00044	73	12	65.3	2.9
	20Jang08	0.071	0.011	0.00962	0.00038	71	10	61.7	2.4
	20Jang09	0.0638	0.0098	0.00978	0.00036	61.4	9.3	62.8	2.3
	20Jang10	0.078	0.019	0.009	0.00065	71	17	57.7	4.1
	20Jang11	0.07	0.019	0.00888	0.00081	65	17	56.9	5.2
	20Jang12	0.072	0.015	0.00937	0.0006	67	14	60.1	3.8
	20Jang13	0.08	0.023	0.00933	0.00068	74	20	59.9	4.3

## Sheet: PAT-ME
	PAT-ME
							Ages
	Sample	207Pb/235U	2 SE	206Pb/238U	2 SE	207Pb/235U	2 SE	206Pb/238U	2 SE
	03Deca06	0.0289	0.0064	0.00439	0.00023	28.8	6.3	28.2	1.5
	03Deca07	0.047	0.02	0.00565	0.00059	43	18	36.3	3.8
	03Deca09	0.033	0.027	0.00333	0.0007	27	25	21.4	4.5
	03Deca10	0.0094	0.003	0.001308	9.4e-05	9.3	3	8.43	0.6
	03Deca11	0.038	0.045	0.0075	0.001	25	40	47.9	6.7
	03Deca12	0.042	0.015	0.00738	0.00058	39	15	47.4	3.7
	03Deca13	0.037	0.011	0.00562	0.00035	37	11	36.1	2.3
	03Deca14	0.055	0.024	0.00901	0.00078	47	22	57.7	5
	03Deca15	0.067	0.028	0.01014	0.0009	53	25	65	5.8
	03Deca16	0.0063	0.0041	0.00131	0.00012	6	4.1	8.45	0.8
	04Deca05	0.0287	0.0098	0.00534	0.00034	27.7	9.5	34.3	2.2
	04Deca06	0.04	0.021	0.00607	0.00062	36	20	39	4
	04Deca07	0.362	0.032	0.0515	0.0013	317	23	323.4	7.8
	04Deca08	0.269	0.041	0.0382	0.0015	235	34	241.4	9.1
	04Deca09	0.026	0.011	0.0054	0.0004	24	11	34.7	2.6
	04Deca10	0.0334	0.0087	0.0063	0.00036	32	8.4	40.5	2.3
	04Deca11	0.014	0.035	0.00337	0.00087	5	32	21.6	5.6
	04Deca12	0.02	0.012	0.00488	0.00042	18	11	31.4	2.7
	04Deca14	0.011	0.016	0.00257	0.00052	10	16	16.6	3.3
	03Deca06	0.0289	0.0064	0.00439	0.00023	28.8	6.3	28.2	1.5
	03Deca07	0.047	0.02	0.00565	0.00059	43	18	36.3	3.8
	03Deca09	0.033	0.027	0.00333	0.0007	27	25	21.4	4.5
	03Deca10	0.0094	0.003	0.001308	9.4e-05	9.3	3	8.43	0.6
	03Deca11	0.038	0.045	0.0075	0.001	25	40	47.9	6.7
	03Deca12	0.042	0.015	0.00738	0.00058	39	15	47.4	3.7
	03Deca13	0.037	0.011	0.00562	0.00035	37	11	36.1	2.3
	03Deca14	0.055	0.024	0.00901	0.00078	47	22	57.7	5
	03Deca15	0.067	0.028	0.01014	0.0009	53	25	65	5.8
	03Deca16	0.0063	0.0041	0.00131	0.00012	6	4.1	8.45	0.8
	03Decb01	0.02	0.012	0.00329	0.00034	17	11	21.2	2.2
	03Decb04	0.0231	0.0065	0.00278	0.00022	22.4	6.4	17.9	1.4
	03Decb07	0.032	0.015	0.00324	0.00037	26	13	20.8	2.4
	03Decb08	0.031	0.015	0.0039	0.00042	24	13	25.1	2.7
	03Decb09	0.0369	0.0096	0.00533	0.00033	35.2	9.2	34.2	2.1
	03Decb10	0.054	0.036	0.00405	0.00074	45	32	26.1	4.7
	03Decb11	0.087	0.015	0.0147	0.00061	81	14	94.1	3.9
	03Decb12	0.31	0.041	0.0411	0.0015	255	31	259.2	9.5
	03Decb13	0.233	0.036	0.037	0.0015	202	30	234.2	9.3
	04Decb01	0.0342	0.0078	0.00544	0.00031	33	7.5	35	2
	04Decb02	0.288	0.027	0.0426	0.0015	275	18	268.5	9.4
	04Decb03	0.0162	0.0051	0.00209	0.0002	15.8	5	13.5	1.3
	04Decb04	0.054	0.019	0.00577	0.00061	51	18	37.1	3.9
	04Decb05	0.0248	0.0099	0.00406	0.00036	21.9	9.3	26.1	2.3
	04Decb07	0.0304	0.0081	0.00581	0.00035	30	7.9	37.4	2.2
	04Decb09	0.043	0.01	0.0059	0.00041	41.3	9.9	37.9	2.6
	04Decb10	0.038	0.011	0.0053	0.00045	35	11	34.1	2.9

## Sheet: PAT-PE
	PAT-PE
							Ages
	Sample	207Pb/235U	2 SE	206Pb/238U	2 SE	207Pb/235U	2 SE	206Pb/238U	2 SE
	25Janc05	0.0114	0.0032	0.00133	0.00011	11.4	3.2	8.59	0.72
	25Janc06	0.0266	0.0062	0.00389	0.00026	26	6	25	1.6
	25Janc10	0.038	0.0071	0.00516	0.00029	37.1	6.8	33.2	1.8
	25Janc12	0.0237	0.0064	0.00321	0.00027	23.2	6.3	20.6	1.7
	25Janc13	0.047	0.013	0.00429	0.00046	46	13	27.6	3
	25Janc14	0.017	0.0037	0.00312	0.00014	17	3.6	20.07	0.91
	25Janc16	0.084	0.015	0.01296	0.00056	79	13	82.9	3.5
	25Janc17	0.0365	0.0061	0.00556	0.00028	36.4	6	35.7	1.8
	25Janc18	0.036	0.013	0.00522	0.00051	32	12	33.5	3.3
	25Jand01	0.149	0.01	0.02207	0.00044	140.7	8.8	140.7	2.8
	25Jand02	0.0271	0.0053	0.00402	0.00022	27.1	5.2	25.8	1.4
	25Jand03	0.0214	0.0074	0.00252	0.00027	20.7	7.2	16.2	1.7
	25Jand04	0.094	0.018	0.01197	0.00072	89	16	76.7	4.6
	25Jand05	0.0731	0.0072	0.01221	0.00033	71.1	6.9	78.2	2.1
	25Jand07	0.2	0.03	0.0297	0.0014	177	26	188.2	8.5
	25Jand08	0.0383	0.0099	0.00469	0.00036	36.2	9.4	30.2	2.3
	25Jand09	0.077	0.011	0.01227	0.00043	75	10	78.6	2.7
	25Jand10	0.0389	0.0071	0.00538	0.00027	37.9	6.9	34.6	1.8
	25Jand11	0.0379	0.0076	0.00621	0.00032	37.2	7.4	39.9	2.1
	25Jand12	0.0308	0.0048	0.00533	0.00021	30.5	4.7	34.3	1.3
	25Jand13	0.041	0.01	0.00533	0.0004	39.4	9.8	34.3	2.6
	25Jand14	0.04	0.011	0.0057	0.00043	39	10	36.7	2.8
	25Jane02	0.0386	0.0072	0.00602	0.00032	37.6	7	38.7	2.1
	25Jane03	0.0148	0.0089	0.00209	0.00027	14.3	8.7	13.5	1.7
	25Jane04	0.0173	0.0089	0.00225	0.00026	17	8.7	14.5	1.7
	25Jane06	0.0167	0.0041	0.00246	0.00019	16.6	4.1	15.9	1.2
	25Jane07	0.089	0.013	0.01207	0.00048	86	12	77.3	3.1
	25Jane08	0.0174	0.0054	0.00255	0.00025	17.1	5.3	16.4	1.6
	25Jane09	0.0622	0.0095	0.00981	0.00039	59.8	9	62.9	2.5
	25Jane10	0.081	0.026	0.01036	0.00085	71	23	66.4	5.4
	25Jane12	0.29	0.046	0.0377	0.0017	251	37	240	11
	25Jane13	0.054	0.016	0.00603	0.00054	52	15	38.7	3.5
	25Jane14	0.088	0.011	0.01218	0.00044	84	10	78.3	2.9
	25Janf02	0.315	0.065	0.045	0.003	240	47	283	19
	25Janf03	0.325	0.034	0.0455	0.0016	285	27	286	10
	25Janf04	0.022	0.01	0.00473	0.00054	18.7	9.4	30.4	3.5
	25Janf05	0.092	0.018	0.01425	0.00083	86	16	91.1	5.2
	25Janf06	0.0416	0.0062	0.0073	0.00029	40.9	6	46.9	1.9
	25Janf07	0.0431	0.0057	0.00709	0.00027	42.3	5.5	45.6	1.7
	25Janf08	0.101	0.011	0.01668	0.00052	95	11	106.6	3.3
	25Janf09	0.043	0.022	0.00483	0.00068	31	17	31	4.3
	25Janf10	0.285	0.049	0.0414	0.0018	239	38	261	11
	25Janf11	0.039	0.012	0.00501	0.00046	36	11	32.2	3
	25Janf12	0.122	0.037	0.0137	0.0014	105	32	87.4	8.9
	25Jang01	0.101	0.024	0.01408	0.00092	94	22	90	5.9
	25Jang02	0.093	0.017	0.01263	0.00077	90	16	81.3	4.9
	25Jang03	0.07	0.015	0.01152	0.00065	66	14	73.8	4.2
	25Jang04	0.0253	0.0086	0.00401	0.00036	24.3	8.2	25.8	2.3
	25Jang06	0.306	0.016	0.04214	0.00073	270	12	266	4.5
	25Jang09	0.046	0.014	0.00568	0.00053	42	12	36.5	3.4

## Sheet: PRC-ME702
	PRC-ME702
							Ages
	Sample	207Pb/235U	2 SE	206Pb/238U	2 SE	207Pb/235U	2 SE	206Pb/238U	2 SE
	20Janh01	0.0188	0.0035	0.00311	0.00016	18.7	3.5	20	1
	20Janh02	0.069	0.038	0.00359	0.0009	64	35	23.1	5.8
	20Janh03	0.091	0.02	0.01246	0.00079	86	18	79.8	5
	20Janh05	0.0234	0.0075	0.00313	0.0003	22.6	7.2	20.1	1.9
	20Janh07	0.006	0.0073	0.00078	0.00027	5.8	7.1	5	1.7
	20Janh08	0.221	0.041	0.0295	0.0018	185	33	187	11
	20Janh09	0.016	0.012	0.0008	0.00023	12.7	9.9	5.2	1.5
	20Janh10	0.218	0.038	0.0278	0.0016	192	31	177	10
	20Janh11	0.023	0.0051	0.00282	0.0002	22.7	5	18.2	1.3
	20Janh13	0.229	0.041	0.0292	0.0016	195	33	185	10
	22Jana06	0.2	0.067	0.0288	0.0024	146	53	183	15
	22Jana07	0.155	0.028	0.0264	0.0012	144	25	168	7.8
	22Jana08	0.174	0.024	0.0291	0.0011	159	21	184.5	6.7
	22Jana10	0.165	0.062	0.0266	0.0024	125	51	169	15
	22Jana11	0.0084	0.0039	0.00135	0.00014	8.2	3.9	8.67	0.89
	22Jana12	0.2	0.042	0.0249	0.0014	166	34	159	8.5
	22Jana13	0.0132	0.0038	0.00205	0.00018	13.1	3.8	13.2	1.2
	22Jana14	0.178	0.044	0.0287	0.0019	151	36	182	12
	22Jana15	0.127	0.018	0.02109	0.00083	120	16	134.4	5.2
	22Jana16	0.124	0.04	0.027	0.0017	111	34	172	11
	22Jana17	0.12	0.013	0.01866	0.00059	113	12	119.1	3.8
	22Jana05	0.0136	0.0098	0.00227	0.00029	12.2	9.6	14.6	1.8
	22Janb05	0.194	0.017	0.02833	0.00081	179	14	180.1	5.1
	22Janb06	0.0174	0.0035	0.00203	0.00012	17.3	3.5	13.06	0.79
	22Janb07	0.188	0.047	0.0274	0.0022	152	38	174	14
	22Janb08	0.0231	0.0076	0.00467	0.0003	22.3	7.3	30	1.9
	22Janb09	0.0173	0.0036	0.00197	0.00011	17.1	3.6	12.67	0.72
	22Janb10	0.013	0.0057	0.00201	0.00021	12.7	5.6	12.9	1.3
	22Janb11	0.0118	0.0088	0.00234	0.00032	8.5	7.9	15	2.1
	22Janb12	0.248	0.089	0.0256	0.0025	171	64	163	16
	22Janb13	0.137	0.04	0.0258	0.0017	110	33	164	11
	22Janb14	0.037	0.016	0.0034	0.00046	32	15	21.8	2.9
	22Janb15	0.231	0.048	0.0273	0.0019	206	40	173	12
	22Janb16	0.195	0.031	0.029	0.0011	172	26	184.3	6.9
	22Janb18	0.0058	0.0067	0.00113	0.00021	5.2	6.5	7.2	1.3

[truncated: 1 more sheets: CL-PE3]
